# Supplementary material for: Synthesis of FeS2 and Co-doped FeS2 films with the aid of supercritical carbon dioxide and their photoelectrochemical properties
Source: Royal Society of Chemistry journal article supplement (doi:10.1039/c1ra00066g), 2011-01-01
Supplement: c1ra00066g.pdf [file c1ra00066g.pdf]

## Supporting Information

Supporting Figure 5c is energy-dispersive X-ray spectroscopy (EDS) of Sample12.

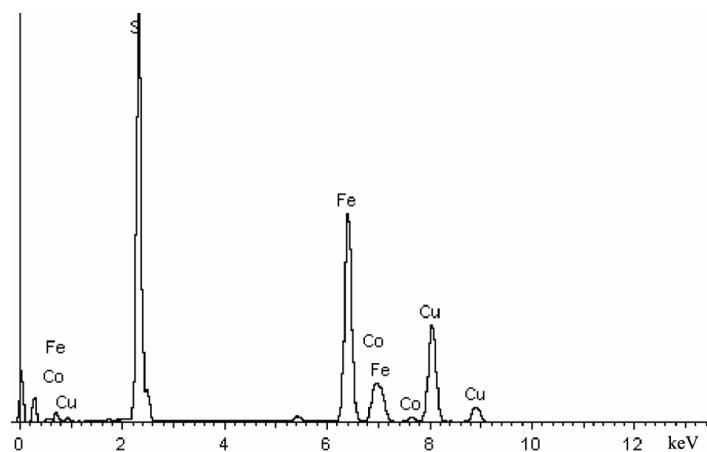

Supporting Figure 5c Energy-dispersive X-ray spectroscopy (EDS) of Sample12
